# Supplementary material for: Occurrence of Aflatoxin M1 in Three Types of Milk from Xinjiang, China, and the Risk of Exposure for Milk Consumers in Different Age-Sex Groups
Source: MDPI journal article supplement (doi:10.3390/foods11233922), 2022-12-05
Supplement: s1 [file s1]

Supplementary materials

**Table S1.** Content in four types of milk samples.

| Sample ID | Milk type   | AFM1 concentration (ng/L) | Sample ID | Milk type   | AFM1 concentration (ng/L) |
|-----------|-------------|---------------------------|-----------|-------------|---------------------------|
| B2-1      | Pasteurized | 9.4                       | B2-19     | Pasteurized | 5.6                       |
| B2-2      | Pasteurized | 11.3                      | B2-20     | Pasteurized | 6.1                       |
| B2-3      | Pasteurized | 7.2                       | B2-21     | Pasteurized | <LOD                      |
| B2-4      | Pasteurized | <LOD                      | B2-22     | Pasteurized | 6.8                       |
| B2-5      | Pasteurized | 10.5                      | B2-23     | Pasteurized | 5.8                       |
| B2-6      | Pasteurized | <LOD                      | B2-24     | Pasteurized | <LOD                      |
| B2-7      | Pasteurized | 8.7                       | B2-25     | Pasteurized | <LOD                      |
| B2-8      | Pasteurized | 8.3                       | B2-26     | Pasteurized | <LOD                      |
| B2-9      | Pasteurized | 8.3                       | B2-27     | Pasteurized | <LOD                      |
| B2-10     | Pasteurized | 7.6                       | B2-28     | Pasteurized | <LOD                      |
| B2-11     | Pasteurized | <LOD                      | B2-29     | Pasteurized | 6.2                       |
| B2-12     | Pasteurized | 6.5                       | B2-30     | Pasteurized | <LOD                      |
| B2-13     | Pasteurized | 8.5                       | B2-31     | Pasteurized | 5.2                       |
| B2-14     | Pasteurized | 8.4                       | B2-32     | Pasteurized | <LOD                      |
| B2-15     | Pasteurized | 9.0                       | B2-33     | Pasteurized | 5.1                       |
| B2-16     | Pasteurized | 9.2                       | B2-34     | Pasteurized | 5.4                       |
| B2-17     | Pasteurized | <LOD                      | B2-35     | Pasteurized | <LOD                      |
| B2-18     | Pasteurized | 7.1                       | B2-36     | Pasteurized | 7.3                       |
| B2-37     | Pasteurized | 7.7                       | M3-13     | Pasteurized | <LOD                      |
| B2-38     | Pasteurized | 7.5                       | M3-14     | Pasteurized | <LOD                      |
| B2-39     | Pasteurized | 6.2                       | M3-15     | Pasteurized | <LOD                      |
| B2-40     | Pasteurized | 7.6                       | M3-16     | Pasteurized | <LOD                      |
| B2-41     | Pasteurized | <LOD                      | M3-17     | Pasteurized | <LOD                      |
| B2-42     | Pasteurized | 6.9                       | M3-18     | Pasteurized | <LOD                      |
| B2-43     | Pasteurized | 8.5                       | M3-19     | Pasteurized | <LOD                      |
| B2-44     | Pasteurized | 8.8                       | M3-20     | Pasteurized | <LOD                      |
| B2-45     | Pasteurized | 7.2                       | M3-21     | Pasteurized | <LOD                      |
| B2-46     | Pasteurized | 6.7                       | M3-22     | Pasteurized | <LOD                      |
| B2-47     | Pasteurized | 6.4                       | M3-23     | Pasteurized | <LOD                      |
| B2-48     | Pasteurized | 7.7                       | M3-24     | Pasteurized | <LOD                      |
| B2-49     | Pasteurized | 8.1                       | M3-25     | Pasteurized | <LOD                      |
| B2-50     | Pasteurized | 6.1                       | M3-26     | Pasteurized | <LOD                      |
| B2-51     | Pasteurized | <LOD                      | M3-27     | Pasteurized | <LOD                      |
| B2-52     | Pasteurized | 5.5                       | M3-28     | Pasteurized | <LOD                      |
| B2-53     | Pasteurized | <LOD                      | M3-29     | Pasteurized | <LOD                      |
| B2-54     | Pasteurized | <LOD                      | A28-1     | ESL         | <LOD                      |
| B2-55     | Pasteurized | 7.4                       | A28-2     | ESL         | 5.6                       |
| B2-56     | Pasteurized | <LOD                      | A28-3     | ESL         | <LOD                      |
| B2-57     | Pasteurized | 6.5                       | A28-4     | ESL         | <LOD                      |
| B2-58     | Pasteurized | 8.3                       | A28-5     | ESL         | 5.3                       |
| B2-59     | Pasteurized | <LOD                      | A28-6     | ESL         | <LOD                      |
| B2-60     | Pasteurized | <LOD                      | A28-7     | ESL         | 7.3                       |
| B2-61     | Pasteurized | <LOD                      | A28-8     | ESL         | <LOD                      |
| B2-62     | Pasteurized | <LOD                      | A28-9     | ESL         | <LOD                      |
| B2-63     | Pasteurized | <LOD                      | A28-10    | ESL         | 7.9                       |
| B2-64     | Pasteurized | <LOD                      | A28-11    | ESL         | 5.1                       |
| M3-1      | Pasteurized | <LOD                      | A28-12    | ESL         | <LOD                      |
| M3-2      | Pasteurized | <LOD                      | F45-1     | ESL         | 12.5                      |
| M3-3      | Pasteurized | <LOD                      | F45-2     | ESL         | 8.3                       |
| M3-4      | Pasteurized | <LOD                      | F45-3     | ESL         | <LOD                      |
| M3-5      | Pasteurized | <LOD                      | F45-4     | ESL         | 7.3                       |
| M3-6      | Pasteurized | <LOD                      | F45-5     | ESL         | <LOD                      |
| M3-7      | Pasteurized | <LOD                      | F45-6     | ESL         | 7.0                       |
| M3-8      | Pasteurized | <LOD                      | F45-7     | ESL         | <LOD                      |

| Sample ID | Milk type   | AFM1 concentration (ng/L) | Sample ID | Milk type   | AFM1 concentration (ng/L) |
|-----------|-------------|---------------------------|-----------|-------------|---------------------------|
| M3-9      | Pasteurized | <LOD                      | F45-8     | ESL         | <LOD                      |
| M3-10     | Pasteurized | <LOD                      | G28-1     | ESL         | <LOD                      |
| M3-11     | Pasteurized | <LOD                      | G28-2     | ESL         | <LOD                      |
| M3-12     | Pasteurized | <LOD                      | G28-3     | ESL         | 8.9                       |
| G28-4     | ESL         | 5.7                       | C45-10    | ESL         | 8.5                       |
| G28-5     | ESL         | <LOD                      | D45-1     | ESL         | 11.2                      |
| G28-6     | ESL         | <LOD                      | D45-2     | ESL         | 10.8                      |
| G28-7     | ESL         | 5.2                       | D45-3     | ESL         | 16.5                      |
| G28-8     | ESL         | 5.8                       | D45-4     | ESL         | 7.6                       |
| G28-9     | ESL         | 7.2                       | D45-5     | ESL         | 8.8                       |
| G28-10    | ESL         | 6.8                       | D45-6     | ESL         | <LOD                      |
| G28-11    | ESL         | <LOD                      | D45-7     | ESL         | 5.4                       |
| H28-1     | ESL         | <LOD                      | D45-8     | ESL         | <LOD                      |
| H28-2     | ESL         | 6.8                       | D45-9     | ESL         | <LOD                      |
| H28-3     | ESL         | <LOD                      | E45-1     | ESL         | 11.4                      |
| H28-4     | ESL         | 6.7                       | E45-2     | ESL         | 9.8                       |
| H28-5     | ESL         | 5.7                       | E45-3     | ESL         | 6.3                       |
| H28-6     | ESL         | <LOD                      | E45-4     | ESL         | <LOD                      |
| H28-7     | ESL         | <LOD                      | E45-5     | ESL         | 5.8                       |
| H28-8     | ESL         | <LOD                      | E45-6     | ESL         | <LOD                      |
| H28-9     | ESL         | <LOD                      | E45-7     | ESL         | <LOD                      |
| H28-10    | ESL         | <LOD                      | E45-8     | ESL         | 13.9                      |
| I21-1     | ESL         | 6.3                       | E45-9     | ESL         | <LOD                      |
| I21-2     | ESL         | 7.8                       | E45-10    | ESL         | <LOD                      |
| I21-3     | ESL         | 5.2                       | E45-11    | ESL         | <LOD                      |
| I21-4     | ESL         | <LOD                      | K45-1     | ESL         | 10.9                      |
| I21-5     | ESL         | <LOD                      | K45-2     | ESL         | <LOD                      |
| I21-6     | ESL         | <LOD                      | K45-3     | ESL         | <LOD                      |
| I21-7     | ESL         | 5.3                       | K45-4     | ESL         | <LOD                      |
| I21-8     | ESL         | <LOD                      | K45-5     | ESL         | 5.4                       |
| J45-1     | ESL         | 10.8                      | K45-6     | ESL         | <LOD                      |
| J45-2     | ESL         | 5.1                       | K45-7     | ESL         | <LOD                      |
| J45-3     | ESL         | <LOD                      | K45-8     | ESL         | <LOD                      |
| J45-4     | ESL         | <LOD                      | L45-1     | ESL         | 8.5                       |
| J45-5     | ESL         | 5.7                       | L45-2     | ESL         | 8.4                       |
| C45-1     | ESL         | 8.3                       | L45-3     | ESL         | <LOD                      |
| C45-2     | ESL         | <LOD                      | L45-4     | ESL         | <LOD                      |
| C45-3     | ESL         | 10.1                      | N1-1      | Donkey milk | <LOD                      |
| C45-4     | ESL         | <LOD                      | N1-2      | Donkey milk | <LOD                      |
| C45-5     | ESL         | 5.6                       | N1-3      | Donkey milk | <LOD                      |
| C45-6     | ESL         | <LOD                      | N1-4      | Donkey milk | <LOD                      |
| C45-7     | ESL         | <LOD                      | N1-5      | Donkey milk | <LOD                      |
| C45-8     | ESL         | <LOD                      | N1-6      | Donkey milk | <LOD                      |
| C45-9     | ESL         | <LOD                      | N1-7      | Donkey milk | <LOD                      |
| N1-8      | Donkey milk | <LOD                      | O1-8      | Donkey milk | <LOD                      |
| N1-9      | Donkey milk | <LOD                      | O1-9      | Donkey milk | <LOD                      |
| N1-10     | Donkey milk | <LOD                      | O1-10     | Donkey milk | <LOD                      |
| N1-11     | Donkey milk | <LOD                      | O1-11     | Donkey milk | <LOD                      |
| N1-12     | Donkey milk | <LOD                      | O1-12     | Donkey milk | <LOD                      |
| N1-13     | Donkey milk | <LOD                      | O1-13     | Donkey milk | <LOD                      |
| N1-14     | Donkey milk | <LOD                      | O1-14     | Donkey milk | <LOD                      |
| N1-15     | Donkey milk | <LOD                      | O1-15     | Donkey milk | <LOD                      |
| N1-16     | Donkey milk | <LOD                      | O1-16     | Donkey milk | <LOD                      |
| N1-17     | Donkey milk | <LOD                      | O1-17     | Donkey milk | <LOD                      |
| N1-18     | Donkey milk | <LOD                      | O1-18     | Donkey milk | <LOD                      |
| N1-19     | Donkey milk | <LOD                      | O1-19     | Donkey milk | <LOD                      |
| N1-20     | Donkey milk | <LOD                      | O1-20     | Donkey milk | <LOD                      |
| N1-21     | Donkey milk | <LOD                      | O1-21     | Donkey milk | <LOD                      |
| N1-22     | Donkey milk | <LOD                      | O1-22     | Donkey milk | <LOD                      |

| Sample ID | Milk type   | AFM1 concentration<br>(ng/L) | Sample ID | Milk type   | AFM1 concentration<br>(ng/L) |
|-----------|-------------|------------------------------|-----------|-------------|------------------------------|
| N1-23     | Donkey milk | <LOD                         | O1-23     | Donkey milk | <LOD                         |
| N1-24     | Donkey milk | <LOD                         | O1-24     | Donkey milk | <LOD                         |
| N1-25     | Donkey milk | <LOD                         | O1-25     | Donkey milk | <LOD                         |
| N1-26     | Donkey milk | <LOD                         | O1-26     | Donkey milk | <LOD                         |
| N1-27     | Donkey milk | <LOD                         | O1-27     | Donkey milk | <LOD                         |
| N1-28     | Donkey milk | <LOD                         | O1-28     | Donkey milk | <LOD                         |
| N1-29     | Donkey milk | <LOD                         | O1-29     | Donkey milk | <LOD                         |
| N1-30     | Donkey milk | <LOD                         | O1-30     | Donkey milk | <LOD                         |
| N1-31     | Donkey milk | <LOD                         | O1-31     | Donkey milk | <LOD                         |
| N1-32     | Donkey milk | <LOD                         | O1-32     | Donkey milk | <LOD                         |
| O1-1      | Donkey milk | <LOD                         | O1-33     | Donkey milk | <LOD                         |
| O1-2      | Donkey milk | <LOD                         | O1-34     | Donkey milk | <LOD                         |
| O1-3      | Donkey milk | <LOD                         | O1-35     | Donkey milk | <LOD                         |
| O1-4      | Donkey milk | <LOD                         | O1-36     | Donkey milk | <LOD                         |
| O1-5      | Donkey milk | <LOD                         | O1-37     | Donkey milk | <LOD                         |
| O1-6      | Donkey milk | <LOD                         | O1-38     | Donkey milk | <LOD                         |
| O1-7      | Donkey milk | <LOD                         |           |             |                              |

**Note:** (1) Sample ID: the first one or two characters indicate the manufacturer, followed by numbers showing the story life (days). And then the last one to two numbers after “dash” are the sampling number. (2) ESL: extended shelf life milk; UHT: ultra-high temperature milk. (3) LOD = 5 ng/L.
